# Supplementary material for: SDF-1α-Releasing Microspheres Effectively Extend Stem Cell Homing after Myocardial Infarction
Source: MDPI journal article supplement (doi:10.3390/biomedicines11020343), 2023-01-25
Supplement: s1 [file s1]

Table S1. Primers used in qRT-PCR analysis.

| <b>Gene</b>                    | <b>Forward primer (5'-3')</b> | <b>Reverse primer (5'-3')</b> |
|--------------------------------|-------------------------------|-------------------------------|
| <b>SDF1<math>\alpha</math></b> | ACCAGTCAGCCTGAGCTACC          | CACTTTAATTTTCGGGTCAATGC       |
| <b>CXCR-4</b>                  | TCAGTCAGGGGGATGACAGG          | TGGCCCTTGGAGTGTGACAGC         |
| <b>VEGFA</b>                   | AAGGAGAGCAGAAGTCCCATGA        | CACAGGACGGCTTGAAGATGT         |
| <b>SCF</b>                     | CTGCGGGAATCCTGTGACTG          | CCAGAAGAGTAGTCAAGCTGAG        |
| <b>VCAM</b>                    | TCTCTCAGGAAATGCCACCC          | CACAGCCAATAGCAGCACAC          |
| <b>ICAM</b>                    | GGCACCCAGCAGAAGTTGTT          | CCTCAGTCACCTCTACCAAG          |
| <b>MMP-9</b>                   | AGAAGCAGTCTCTACGGCCG          | TGATGGTCCCCTTGAGGCC           |
| <b>GAPDH</b>                   | GCACCGTCAAGGCTGAGAAC          | ATGGTGGTGAAGACGCCAGT          |
